# Supplementary material
Source: publisher site journal article supplement (http://www.kjim.org/upload/media/kjim-2021-069-suppl4.pdf)
Supplement: Supplementary file 1 [file kjim-2021-069-suppl4.pdf]

**Supplementary Table 4. Sensitivities and specificities according to various cut-off values of ADIMS in the validation group**

| Cut-off | Sensitivity, % | Specificity, % | Correctly classified, % |
|---------|----------------|----------------|-------------------------|
| ≥ 7     | 100.00         | 58.97          | 64.44                   |
| ≥ 8     | 100.00         | 75.21          | 78.52                   |
| ≥ 9     | 100.00         | 79.49          | 82.22                   |
| ≥ 10    | 94.44          | 87.18          | 88.15                   |
| ≥ 12    | 94.44          | 92.31          | 92.59                   |
| ≥ 14    | 94.44          | 95.73          | 95.56                   |
| ≥ 18    | 94.44          | 96.58          | 96.30                   |
| ≥ 21    | 83.33          | 98.29          | 96.30                   |
| ≥ 22    | 72.22          | 98.29          | 94.81                   |
| ≥ 23    | 66.67          | 98.29          | 94.07                   |
| ≥ 24    | 66.67          | 100.00         | 95.56                   |
| ≥ 25    | 50.00          | 100.00         | 93.33                   |

ADIMS, Acute Eosinophilic Pneumonia Diagnostic Index in Military Smokers.
